# Supplementary material for: Fabrication of Phase‐Change Polymer Colloidal Photonic Crystals
Source: Hindawi journal article supplement (doi:10.1155/2014/702089), 2014-01-01
Supplement: f1 [file 702089.f1.pdf]

Supporting Information for

Fabrication of phase-change polymer colloidal crystals<sup>1</sup>

Tianyi Zhao, Jingxia Wang,\* Youzhuan Zhang, Yanlin Song, and Lei Jiang

Table S1. The influence of the mixing ratio of n-hexane/polymer on the resultant morphology of latex spheres.

| Ratio of<br>n-hexane/polymer | 0.1:1        | 1:1          | 2:1              | 8:1              | 10:1 | 12:1   | 20:1   |
|------------------------------|--------------|--------------|------------------|------------------|------|--------|--------|
| morphology                   | no<br>change | no<br>change | black<br>residue | black<br>residue | good | broken | broken |

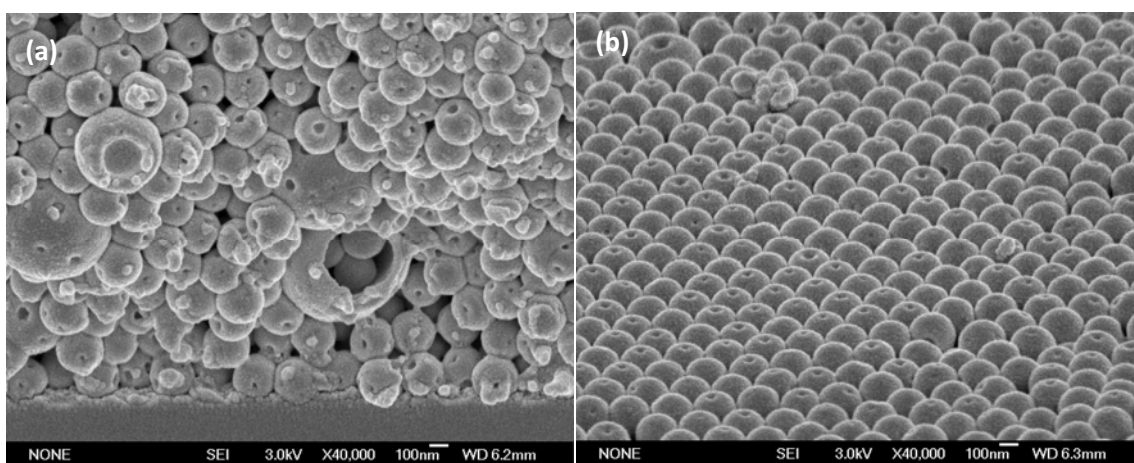

Figure S1. SEM images of the films assembled from hollow latex particles, the latex was treated in liquid N<sub>2</sub> for 5min.

Clearly, obvious hollow cavity could be seen for large latex spheres in (a), or there is some cavity could be clearly found in latex surface in (b). All these confirm the obtainment of the hollow latex particles.

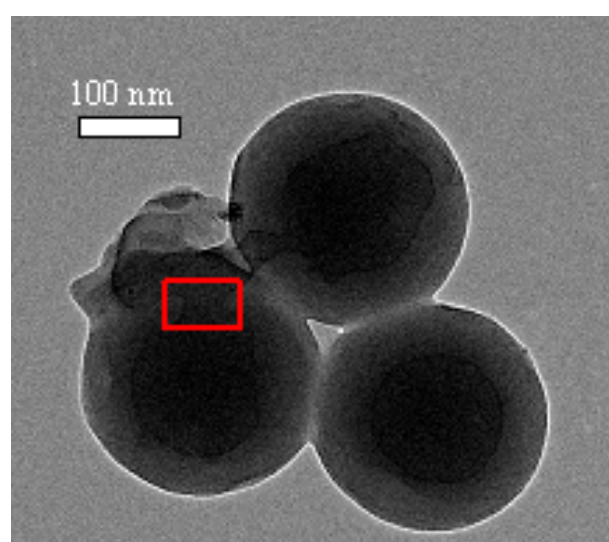

Figure S2. TEM image of latex spheres encapsulated with n-dedocanol. The encapsulated materials can be clearly observed from flow-like core, inserted red rectangle shows the flow-out of some encapsulated material.
